# Supplementary material
Source: MDPI journal article supplement (https://www.mdpi.com/2304-6740/11/1/18)
Supplement: s1 [file s1]

# Synthesis, DFT and X-Ray Studies of Trans CuCl<sub>2</sub>L<sub>2</sub> with L is (E)-(4-chlorophenyl)-N-(3-phenyl-4H-1,2,4-triazol-4-yl)methanimine

Hassan H. Hammud<sup>1\*</sup>, Moheddine Wehbie<sup>2</sup>, Mohamed M. Abdul-Ghani<sup>3</sup>, Zoltan A Gal<sup>4</sup>, Malai Haniti Sheikh Abdul Hamid<sup>5</sup>, Nadeem S. Sheikh<sup>5\*</sup>

<sup>1</sup>Department of Chemistry, College of Science, King Faisal University, P.O. Box 400, Al-Ahsa 31982, Saudi Arabia

<sup>2</sup>Chimie Paristech-PSL University, Paris 75005, France

<sup>3</sup>Materia Verte Co., Beirut, Lebanon

<sup>4</sup>Oxford Cryosystems, 3 Blenheim Office Park, Long Hanborough, Oxford OX29 8LN, United Kingdom

<sup>5</sup>Chemical Sciences, Faculty of Science, Universiti Brunei Darussalam, Jalan Tungku Link, Gadong BE1410, Brunei

\*Correspondence: hhammoud@kfu.edu.sa (H.H.H.); nadeem.sheikh@ubd.edu.bn (N.S.S.)

## SUPPLEMENTARY INFORMATION

### Crystal structure Supplementary information

**Table S1. Crystal data of copper(II) complex (6) trans-CuCl<sub>2</sub>L<sub>2</sub> (CCDC No. 2217976)**

|                                           |                                                                   |
|-------------------------------------------|-------------------------------------------------------------------|
| Identification code                       | Cu Complex                                                        |
| Empirical formula                         | C <sub>30</sub> H <sub>22</sub> N <sub>8</sub> Cl <sub>4</sub> Cu |
| Formula weight                            | 699.90                                                            |
| Temperature/K                             | 150.0                                                             |
| Crystal system                            | monoclinic                                                        |
| Space group                               | P2 <sub>1</sub> /c                                                |
| a/Å, b/Å, c/Å                             | 10.933(2), 13.1221(14), 11.2068(16)                               |
| α/°, β/°, γ/°                             | 90.00, 114.68(2), 90.00                                           |
| Volume/Å <sup>3</sup>                     | 1460.9(4)                                                         |
| Z                                         | 2                                                                 |
| ρ <sub>calc</sub> /mg mm <sup>-3</sup>    | 1.591                                                             |
| μ/mm <sup>-1</sup>                        | 1.151                                                             |
| F(000)                                    | 710                                                               |
| Crystal size/mm <sup>3</sup>              | 0.2 × 0.1 × 0.05                                                  |
| 2θ range for data collection              | 6.2 to 50.7°                                                      |
| Index ranges                              | -11 ≤ h ≤ 13, -15 ≤ k ≤ 15, -13 ≤ l ≤ 13                          |
| Reflections collected                     | 10555                                                             |
| Independent reflections                   | 2661 [R(int) = 0.0375]                                            |
| Data/restraints/parameters                | 2661/0/196                                                        |
| Goodness-of-fit on F <sup>2</sup>         | 1.041                                                             |
| Final R indexes [I > 2J (I)]              | R <sub>1</sub> = 0.0318, wR <sub>2</sub> = 0.0735                 |
| Final R indexes [all data]                | R <sub>1</sub> = 0.0394, wR <sub>2</sub> = 0.0779                 |
| Largest diff. peak/hole/e Å <sup>-3</sup> | 0.465/-0.474                                                      |

## DFT Supplementary Information

**Table S2. Computed Energies and Cartesian Coordinates for copper(II) complex (6) trans-CuCl<sub>2</sub>L<sub>2</sub>**

**Computed Energies [values are in Hartree] (6-31G(d)/LanL2DZ)**

| Method    | Total Electronic Energy    | Sum of Electronic and Zero-point Energies | Sum of Electronic and Thermal Enthalpies | Gibbs Free Energy         |
|-----------|----------------------------|-------------------------------------------|------------------------------------------|---------------------------|
| CAM-B3LYP | -1849.3559064              | -1848.876464                              | -1848.836448                             | -1848.959825              |
|           | -1849.4185592*             | -1848.940462*                             | -1848.900218*                            | -1849.024638*             |
|           | -1849.3892385 <sup>†</sup> | -1848.910599 <sup>†</sup>                 | -1848.870586 <sup>†</sup>                | -1848.993939 <sup>†</sup> |
|           | -1849.4516009 <sup>‡</sup> | -1848.974274 <sup>‡</sup>                 | -1848.934032 <sup>‡</sup>                | -1849.058388 <sup>‡</sup> |
| ωB97XD    | -1849.8827604              | -1849.403261                              | -1849.363333                             | -1849.485606              |
| B3LYP     | -1850.3767652              | -1849.904940                              | -1849.864351                             | -1849.988412              |
| MPW1PW91  | -1850.0841113              | -1849.606888                              | -1849.566649                             | -1849.689788              |
| B3PW91    | -1849.8971297              | -1849.423566                              | -1849.383075                             | -1849.506738              |
| PBEPBE    | -1848.4243762              | -1847.965984                              | -1847.924469                             | -1848.050141              |

\*6-31+G(d)/LanL2DZ, <sup>†</sup>6-31G(d,p)/LanL2DZ, <sup>‡</sup>6-31+G(d,p)/LanL2DZ.

### Cartesian Coordinates [CAM-B3LYP/6-31G(d)/LanL2DZ]

|    |             |             |             |
|----|-------------|-------------|-------------|
| Cu | -0.00000800 | -0.00018000 | 0.54586800  |
| N  | -1.91097700 | -0.55415600 | 0.52108700  |
| C  | -3.00680500 | 0.15416600  | 0.36678800  |
| C  | -3.48000200 | -1.97945800 | 0.31727900  |
| H  | -4.04034700 | -2.90028700 | 0.29166700  |
| N  | 1.91091900  | 0.55393900  | 0.52101100  |
| C  | 3.00680200  | -0.15430700 | 0.36675100  |
| C  | 3.47982200  | 1.97935200  | 0.31702800  |
| H  | 4.04009000  | 2.90022500  | 0.29131100  |
| N  | -2.20112900 | -1.88350500 | 0.50732500  |
| N  | -4.03919500 | -0.72935000 | 0.21083100  |
| N  | 2.20096100  | 1.88331100  | 0.50710600  |
| N  | 4.03911400  | 0.72928000  | 0.21068300  |
| C  | -3.10430500 | 1.61471800  | 0.36335400  |
| C  | -3.93415900 | 2.28480100  | -0.53921400 |
| C  | -2.32675900 | 2.33929400  | 1.27165400  |
| C  | -3.98302700 | 3.67136500  | -0.53245600 |
| H  | -4.52368500 | 1.72415800  | -1.25486200 |
| C  | -2.38226700 | 3.72725700  | 1.26823300  |
| H  | -1.69432800 | 1.81514100  | 1.98323500  |
| C  | -3.20805900 | 4.39386100  | 0.37007600  |
| H  | -4.62088300 | 4.18982700  | -1.24107100 |
| H  | -1.77678500 | 4.28559000  | 1.97448800  |
| H  | -3.24712700 | 5.47880100  | 0.36997200  |
| C  | 3.10443000  | -1.61485200 | 0.36343300  |
| C  | 3.93432500  | -2.28493000 | -0.53910100 |

|    |              |             |             |
|----|--------------|-------------|-------------|
| C  | 2.32697400   | -2.33943000 | 1.27180900  |
| C  | 3.98332300   | -3.67148900 | -0.53223600 |
| H  | 4.52378400   | -1.72428900 | -1.25480600 |
| C  | 2.38261000   | -3.72738800 | 1.26849500  |
| H  | 1.69451300   | -1.81528000 | 1.98336600  |
| C  | 3.20844300   | -4.39398600 | 0.37037000  |
| H  | 4.62121000   | -4.18994700 | -1.24082500 |
| H  | 1.77719800   | -4.28572100 | 1.97480900  |
| H  | 3.24761100   | -5.47892200 | 0.37035100  |
| N  | -5.35824700  | -0.34793300 | 0.12248600  |
| N  | 5.35819500   | 0.34796300  | 0.12233700  |
| C  | -6.15877200  | -1.16546600 | -0.44307500 |
| C  | 6.15863900   | 1.16551000  | -0.44331700 |
| H  | -5.81576500  | -2.10640700 | -0.88178000 |
| H  | 5.81554400   | 2.10638400  | -0.88209700 |
| C  | -7.58747300  | -0.87020500 | -0.54834200 |
| C  | -8.41723600  | -1.76519300 | -1.22575700 |
| C  | -8.13650000  | 0.28925900  | 0.01114100  |
| C  | -9.77694400  | -1.51446700 | -1.35233400 |
| H  | -7.99833400  | -2.66749800 | -1.66203200 |
| C  | -9.49074700  | 0.54995300  | -0.10979100 |
| H  | -7.48864300  | 0.97912100  | 0.54011000  |
| C  | -10.29323800 | -0.35773400 | -0.79093200 |
| H  | -10.42675100 | -2.20395700 | -1.87749300 |
| H  | -9.92692400  | 1.44398200  | 0.31953900  |
| C  | 7.58736200   | 0.87035900  | -0.54858900 |
| C  | 8.41703500   | 1.76535700  | -1.22610200 |
| C  | 8.13649900   | -0.28900800 | 0.01098500  |
| C  | 9.77676100   | 1.51473400  | -1.35268600 |
| H  | 7.99804800   | 2.66758800  | -1.66244800 |
| C  | 9.49076500   | -0.54959900 | -0.10995300 |
| H  | 7.48871100   | -0.97887900 | 0.54002900  |
| C  | 10.29316500  | 0.35809500  | -0.79119200 |
| H  | 10.42649900  | 2.20423200  | -1.87792000 |
| H  | 9.92702700   | -1.44355300 | 0.31944700  |
| Cl | -12.03243800 | -0.02559500 | -0.94329100 |
| Cl | 12.03238900  | 0.02608900  | -0.94355800 |
| Cl | -0.00002400  | 0.00000900  | 2.89124700  |
| Cl | -0.00003900  | -0.00022900 | -1.77658400 |

**Cartesian Coordinates [CAM-B3LYP/6-31+G(d)/LanL2DZ]**

|    |             |             |            |
|----|-------------|-------------|------------|
| Cu | 0.00000800  | 0.00002200  | 0.71072800 |
| N  | -1.92342600 | -0.54819700 | 0.67082500 |
| C  | -3.00940000 | 0.16588800  | 0.47431900 |
| C  | -3.48855700 | -1.96500800 | 0.38629000 |
| H  | -4.05225400 | -2.88315600 | 0.33104700 |
| N  | 1.92344300  | 0.54823800  | 0.67074200 |
| C  | 3.00941100  | -0.16585800 | 0.47425100 |
| C  | 3.48856800  | 1.96503200  | 0.38609100 |
| H  | 4.05226400  | 2.88317600  | 0.33078300 |
| N  | -2.21792000 | -1.87566400 | 0.63315400 |
| N  | -4.03660000 | -0.71152300 | 0.26440700 |
| N  | 2.21793600  | 1.87570300  | 0.63298700 |
| N  | 4.03660700  | 0.71153900  | 0.26426600 |
| C  | -3.10146600 | 1.62762900  | 0.48147700 |

|    |              |             |             |
|----|--------------|-------------|-------------|
| C  | -3.87480400  | 2.31065000  | -0.46181300 |
| C  | -2.37658500  | 2.34029700  | 1.44204700  |
| C  | -3.92192300  | 3.69873700  | -0.44271400 |
| H  | -4.42031700  | 1.76073100  | -1.22037300 |
| C  | -2.43025800  | 3.72969600  | 1.45296500  |
| H  | -1.78316000  | 1.80753200  | 2.18008600  |
| C  | -3.20068000  | 4.40979600  | 0.51420200  |
| H  | -4.51454900  | 4.22686600  | -1.18341300 |
| H  | -1.86463300  | 4.27841500  | 2.19935400  |
| H  | -3.23697500  | 5.49518800  | 0.52413800  |
| C  | 3.10147600   | -1.62760000 | 0.48149100  |
| C  | 3.87479200   | -2.31067500 | -0.46177800 |
| C  | 2.37661600   | -2.34021200 | 1.44211800  |
| C  | 3.92191000   | -3.69876100 | -0.44260100 |
| H  | 4.42028800   | -1.76080000 | -1.22038100 |
| C  | 2.43028800   | -3.72961100 | 1.45311400  |
| H  | 1.78320900   | -1.80740500 | 2.18014000  |
| C  | 3.20068800   | -4.40976400 | 0.51437100  |
| H  | 4.51451800   | -4.22693300 | -1.18328400 |
| H  | 1.86468000   | -4.27828600 | 2.19954600  |
| H  | 3.23698100   | -5.49515600 | 0.52436800  |
| N  | -5.35620200  | -0.33448300 | 0.13636000  |
| N  | 5.35620600   | 0.33449100  | 0.13621000  |
| C  | -6.11038700  | -1.12125300 | -0.52886700 |
| C  | 6.11037600   | 1.12122200  | -0.52908000 |
| H  | -5.71950900  | -2.01852800 | -1.01756400 |
| H  | 5.71948800   | 2.01847000  | -1.01781800 |
| C  | -7.54011000  | -0.85001400 | -0.68504000 |
| C  | -8.30731600  | -1.70205100 | -1.48318100 |
| C  | -8.15135400  | 0.24573500  | -0.06262000 |
| C  | -9.66537900  | -1.47005500 | -1.66880500 |
| H  | -7.84162900  | -2.55482800 | -1.96982500 |
| C  | -9.50448600  | 0.48654500  | -0.24160300 |
| H  | -7.55579300  | 0.90309200  | 0.56160100  |
| C  | -10.24314300 | -0.37643900 | -1.04354500 |
| H  | -10.26480400 | -2.12730200 | -2.28810100 |
| H  | -9.98693000  | 1.33165500  | 0.23609600  |
| C  | 7.54009500   | 0.84997400  | -0.68527000 |
| C  | 8.30728300   | 1.70196300  | -1.48348000 |
| C  | 8.15135300   | -0.24574000 | -0.06280100 |
| C  | 9.66534100   | 1.46995400  | -1.66912300 |
| H  | 7.84158500   | 2.55471100  | -1.97016300 |
| C  | 9.50448000   | -0.48656100 | -0.24180200 |
| H  | 7.55580600   | -0.90305900 | 0.56147300  |
| C  | 10.24311900  | 0.37637500  | -1.04381300 |
| H  | 10.26475200  | 2.12716400  | -2.28847300 |
| H  | 9.98693500   | -1.33164400 | 0.23593500  |
| Cl | -11.97846300 | -0.06913000 | -1.26990900 |
| Cl | 11.97843300  | 0.06905100  | -1.27020100 |
| Cl | 0.00004100   | 0.00008900  | 3.05047700  |
| Cl | -0.00002200  | -0.00004600 | -1.61435200 |

**Cartesian Coordinates** [CAM-B3LYP/6-31G(d,p)/LanL2DZ]

|    |             |             |            |
|----|-------------|-------------|------------|
| Cu | -0.00001100 | -0.00021900 | 0.54186700 |
| N  | -1.91031000 | -0.55577800 | 0.51729300 |

|   |              |             |             |
|---|--------------|-------------|-------------|
| C | -3.00610200  | 0.15286200  | 0.36357400  |
| C | -3.48009200  | -1.98095000 | 0.31568800  |
| H | -4.04054200  | -2.90143900 | 0.29105900  |
| N | 1.91023800   | 0.55551300  | 0.51721700  |
| C | 3.00609700   | -0.15303600 | 0.36354300  |
| C | 3.47987600   | 1.98082100  | 0.31542900  |
| H | 4.04023500   | 2.90136300  | 0.29068900  |
| N | -2.20079100  | -1.88470000 | 0.50440100  |
| N | -4.03865100  | -0.73034400 | 0.20918000  |
| N | 2.20058900   | 1.88446300  | 0.50417300  |
| N | 4.03855400   | 0.73025800  | 0.20903300  |
| C | -3.10193600  | 1.61346000  | 0.35941700  |
| C | -3.93635400  | 2.28393300  | -0.53841700 |
| C | -2.31718300  | 2.33718000  | 1.26203500  |
| C | -3.98262200  | 3.67034400  | -0.53240400 |
| H | -4.53174100  | 1.72358400  | -1.24906400 |
| C | -2.37031600  | 3.72497200  | 1.25748700  |
| H | -1.68160200  | 1.81218300  | 1.97020000  |
| C | -3.20058900  | 4.39204300  | 0.36422700  |
| H | -4.62399500  | 4.18943100  | -1.23693300 |
| H | -1.75968200  | 4.28292600  | 1.95917600  |
| H | -3.23776000  | 5.47677700  | 0.36345200  |
| C | 3.10208400   | -1.61362500 | 0.35950700  |
| C | 3.93655500   | -2.28408000 | -0.53829000 |
| C | 2.31743400   | -2.33735900 | 1.26220500  |
| C | 3.98297700   | -3.67048500 | -0.53216600 |
| H | 4.53186500   | -1.72372400 | -1.24899600 |
| C | 2.37072000   | -3.72514400 | 1.25776800  |
| H | 1.68181300   | -1.81237600 | 1.97034300  |
| C | 3.20104400   | -4.39219800 | 0.36454300  |
| H | 4.62439100   | -4.18955900 | -1.23666700 |
| H | 1.76016500   | -4.28310900 | 1.95951800  |
| H | 3.23833600   | -5.47692800 | 0.36385600  |
| N | -5.35749500  | -0.34846500 | 0.12099500  |
| N | 5.35743300   | 0.34850000  | 0.12085000  |
| C | -6.15920000  | -1.16770900 | -0.44037300 |
| C | 6.15904200   | 1.16776700  | -0.44062000 |
| H | -5.81827200  | -2.11065000 | -0.87660200 |
| H | 5.81801000   | 2.11063300  | -0.87693000 |
| C | -7.58767000  | -0.87072300 | -0.54400500 |
| C | -8.41973700  | -1.76702300 | -1.21651600 |
| C | -8.13373200  | 0.29153400  | 0.01224300  |
| C | -9.77905200  | -1.51478900 | -1.34144800 |
| H | -8.00295200  | -2.67134500 | -1.65006700 |
| C | -9.48755100  | 0.55366200  | -0.10718300 |
| H | -7.48339700  | 0.98192000  | 0.53723400  |
| C | -10.29241600 | -0.35533300 | -0.78341800 |
| H | -10.43121900 | -2.20475900 | -1.86261500 |
| H | -9.92209400  | 1.44958900  | 0.31935500  |
| C | 7.58754000   | 0.87091500  | -0.54425400 |
| C | 8.41950200   | 1.76723400  | -1.21686900 |
| C | 8.13373100   | -0.29123400 | 0.01209300  |
| C | 9.77884000   | 1.51512500  | -1.34180700 |
| H | 8.00261700   | 2.67147300  | -1.65049800 |
| C | 9.48757400   | -0.55323700 | -0.10733700 |

|    |              |             |             |
|----|--------------|-------------|-------------|
| H  | 7.48347700   | -0.98163500 | 0.53716500  |
| C  | 10.29233300  | 0.35577500  | -0.78367700 |
| H  | 10.43092600  | 2.20511100  | -1.86305400 |
| H  | 9.92221700   | -1.44907900 | 0.31927800  |
| Cl | -12.03125500 | -0.02121200 | -0.93377000 |
| Cl | 12.03120200  | 0.02181500  | -0.93403400 |
| Cl | -0.00003600  | -0.00000400 | 2.88756200  |
| Cl | -0.00004100  | -0.00026900 | -1.78045700 |

**Cartesian Coordinates** [CAM-B3LYP/6-31+G(d,p)/LanL2DZ]

|    |             |             |             |
|----|-------------|-------------|-------------|
| Cu | -0.00003900 | -0.00067800 | 0.69635900  |
| N  | -1.92304800 | -0.54921200 | 0.65729400  |
| C  | -3.00940100 | 0.16533000  | 0.46394200  |
| C  | -3.48994500 | -1.96579300 | 0.37925900  |
| H  | -4.05371100 | -2.88349000 | 0.32620600  |
| N  | 1.92285200  | 0.54829600  | 0.65746300  |
| C  | 3.00937100  | -0.16594100 | 0.46390100  |
| C  | 3.48942800  | 1.96532200  | 0.37986100  |
| H  | 4.05298300  | 2.88316400  | 0.32708000  |
| N  | -2.21820100 | -1.87617500 | 0.62157800  |
| N  | -4.03750500 | -0.71174300 | 0.25834700  |
| N  | 2.21770100  | 1.87533800  | 0.62213000  |
| N  | 4.03727300  | 0.71143400  | 0.25857500  |
| C  | -3.09920800 | 1.62712200  | 0.47006600  |
| C  | -3.88171000 | 2.31054300  | -0.46518800 |
| C  | -2.36125400 | 2.33915700  | 1.42100700  |
| C  | -3.92481700 | 3.69859000  | -0.44752000 |
| H  | -4.43771600 | 1.76119600  | -1.21576100 |
| C  | -2.41093200 | 3.72847300  | 1.43000400  |
| H  | -1.76126600 | 1.80576700  | 2.15313900  |
| C  | -3.19042600 | 4.40906700  | 0.49943400  |
| H  | -4.52444200 | 4.22702600  | -1.18157500 |
| H  | -1.83541200 | 4.27659000  | 2.16850800  |
| H  | -3.22360700 | 5.49407400  | 0.50801200  |
| C  | 3.09953100  | -1.62771400 | 0.46954400  |
| C  | 3.88220700  | -2.31062800 | -0.46593600 |
| C  | 2.36176100  | -2.34025300 | 1.42025000  |
| C  | 3.92566500  | -3.69867000 | -0.44873200 |
| H  | 4.43807800  | -1.76089100 | -1.21632300 |
| C  | 2.41178900  | -3.72956000 | 1.42878200  |
| H  | 1.76164000  | -1.80726200 | 2.15256100  |
| C  | 3.19145300  | -4.40964800 | 0.49798400  |
| H  | 4.52542500  | -4.22671000 | -1.18296300 |
| H  | 1.83640600  | -4.27806800 | 2.16710200  |
| H  | 3.22490700  | -5.49465000 | 0.50620000  |
| N  | -5.35709200 | -0.33395000 | 0.13378000  |
| N  | 5.35694600  | 0.33398100  | 0.13388700  |
| C  | -6.11545100 | -1.12407300 | -0.52274100 |
| C  | 6.11511700  | 1.12447400  | -0.52240400 |
| H  | -5.72941900 | -2.02507600 | -1.00805700 |
| H  | 5.72887100  | 2.02553100  | -1.00745100 |
| C  | -7.54541400 | -0.85052200 | -0.67260700 |
| C  | -8.31841600 | -1.70474900 | -1.46251200 |
| C  | -8.15077200 | 0.24940400  | -0.05205200 |
| C  | -9.67670100 | -1.47058100 | -1.64217100 |

|    |              |             |             |
|----|--------------|-------------|-------------|
| H  | -7.85728700  | -2.56060000 | -1.94710200 |
| C  | -9.50404000  | 0.49232900  | -0.22523200 |
| H  | -7.55020000  | 0.90755700  | 0.56593400  |
| C  | -10.24847500 | -0.37273400 | -1.01924100 |
| H  | -10.28103400 | -2.12884700 | -2.25483800 |
| H  | -9.98241500  | 1.34023500  | 0.25067700  |
| C  | 7.54514200   | 0.85130100  | -0.67236000 |
| C  | 8.31793900   | 1.70593800  | -1.46202400 |
| C  | 8.15076400   | -0.24866100 | -0.05212600 |
| C  | 9.67627700   | 1.47214100  | -1.64176000 |
| H  | 7.85660500   | 2.56182000  | -1.94636400 |
| C  | 9.50408800   | -0.49121800 | -0.22538600 |
| H  | 7.55035100   | -0.90713400 | 0.56567400  |
| C  | 10.24831400  | 0.37425000  | -1.01915000 |
| H  | 10.28045100  | 2.13072600  | -2.25424100 |
| H  | 9.98266600   | -1.33914800 | 0.25027600  |
| Cl | -11.98415700 | -0.06260200 | -1.23809000 |
| Cl | 11.98406800  | 0.06458900  | -1.23810000 |
| Cl | -0.00011000  | -0.00082100 | 3.03670200  |
| Cl | -0.00006700  | -0.00023100 | -1.62826800 |

**Cartesian Coordinates** [ $\omega$ B97XD/6-31G(d)/LanL2DZ]

|    |             |             |             |
|----|-------------|-------------|-------------|
| Cu | 0.00001200  | 0.00007200  | 0.79924600  |
| N  | -1.89601900 | -0.61918100 | 0.77201000  |
| C  | -2.97566500 | 0.09495200  | 0.54055600  |
| C  | -3.47640300 | -2.03101500 | 0.57400900  |
| H  | -4.05281200 | -2.94283400 | 0.57286500  |
| N  | 1.89605200  | 0.61929400  | 0.77191000  |
| C  | 2.97568000  | -0.09487300 | 0.54047800  |
| C  | 3.47645200  | 2.03108900  | 0.57374800  |
| H  | 4.05287700  | 2.94289800  | 0.57251700  |
| N  | -2.20151700 | -1.94315200 | 0.81226300  |
| N  | -4.01166500 | -0.78033500 | 0.38573400  |
| N  | 2.20157500  | 1.94326300  | 0.81206700  |
| N  | 4.01169200  | 0.78038400  | 0.38557700  |
| C  | -3.03840000 | 1.55379300  | 0.44478100  |
| C  | -3.79890900 | 2.18120700  | -0.54623100 |
| C  | -2.27914200 | 2.31595800  | 1.33964200  |
| C  | -3.79530900 | 3.56682000  | -0.64238400 |
| H  | -4.37120900 | 1.58784100  | -1.25076500 |
| C  | -2.27773100 | 3.70196900  | 1.22983200  |
| H  | -1.70302200 | 1.82488400  | 2.12138700  |
| C  | -3.03321600 | 4.32764100  | 0.24196400  |
| H  | -4.37704700 | 4.05326400  | -1.41917500 |
| H  | -1.68188100 | 4.29025000  | 1.92001200  |
| H  | -3.02658200 | 5.41025000  | 0.15678000  |
| C  | 3.03839000  | -1.55372300 | 0.44481900  |
| C  | 3.79887100  | -2.18122800 | -0.54615800 |
| C  | 2.27913800  | -2.31580400 | 1.33975600  |
| C  | 3.79525000  | -3.56684800 | -0.64219900 |
| H  | 4.37116700  | -1.58792600 | -1.25074800 |
| C  | 2.27770600  | -3.70182500 | 1.23005800  |
| H  | 1.70303900  | -1.82466000 | 2.12147200  |
| C  | 3.03316300  | -4.32758700 | 0.24222600  |
| H  | 4.37696700  | -4.05336300 | -1.41896100 |

|    |              |             |             |
|----|--------------|-------------|-------------|
| H  | 1.68186100   | -4.29004100 | 1.92029700  |
| H  | 3.02651300   | -5.41020200 | 0.15713000  |
| N  | -5.31976500  | -0.38424700 | 0.21794700  |
| N  | 5.31978300   | 0.38426300  | 0.21779900  |
| C  | -6.07390600  | -1.18257200 | -0.43669500 |
| C  | 6.07392800   | 1.18254300  | -0.43689400 |
| H  | -5.69537200  | -2.10952400 | -0.87903600 |
| H  | 5.69540600   | 2.10948500  | -0.87926500 |
| C  | -7.48830500  | -0.86875000 | -0.64528200 |
| C  | -8.26838800  | -1.72490800 | -1.42694600 |
| C  | -8.06829100  | 0.27817700  | -0.08712000 |
| C  | -9.61072400  | -1.44794100 | -1.65862400 |
| H  | -7.82587200  | -2.61587800 | -1.86446600 |
| C  | -9.40572200  | 0.56489500  | -0.31108000 |
| H  | -7.46004900  | 0.93884000  | 0.52160600  |
| C  | -10.15796300 | -0.30422400 | -1.09514500 |
| H  | -10.22128800 | -2.10561400 | -2.26610000 |
| H  | -9.86478500  | 1.44876600  | 0.11633500  |
| C  | 7.48831100   | 0.86866800  | -0.64551200 |
| C  | 8.26840100   | 1.72478100  | -1.42721800 |
| C  | 8.06827400   | -0.27826500 | -0.08733800 |
| C  | 9.61072200   | 1.44776400  | -1.65892400 |
| H  | 7.82590500   | 2.61575800  | -1.86474400 |
| C  | 9.40568800   | -0.56503500 | -0.31132900 |
| H  | 7.46002500   | -0.93889400 | 0.52141800  |
| C  | 10.15793800  | 0.30404100  | -1.09543400 |
| H  | 10.22129500  | 2.10540400  | -2.26642600 |
| H  | 9.86473200   | -1.44891200 | 0.11609300  |
| Cl | -11.87268200 | 0.06132200  | -1.38171600 |
| Cl | 11.87263600  | -0.06157100 | -1.38204200 |
| Cl | 0.00005400   | 0.00014000  | 3.14259900  |
| Cl | -0.00002100  | -0.00001400 | -1.52658400 |

**Cartesian Coordinates [B3LYP/6-31G(d)/LanL2DZ]**

|    |             |             |             |
|----|-------------|-------------|-------------|
| Cu | -0.00006100 | -0.00013400 | 0.53383400  |
| N  | -1.93637800 | -0.53966300 | 0.50576800  |
| C  | -3.04031500 | 0.17366500  | 0.35807300  |
| C  | -3.50783000 | -1.97247600 | 0.25675100  |
| H  | -4.06558800 | -2.89443300 | 0.20849100  |
| N  | 1.93617300  | 0.53959300  | 0.50530700  |
| C  | 3.04017500  | -0.17364600 | 0.35774500  |
| C  | 3.50753300  | 1.97251400  | 0.25634000  |
| H  | 4.06522600  | 2.89451300  | 0.20811700  |
| N  | -2.22432300 | -1.87702800 | 0.46133900  |
| N  | -4.07522400 | -0.71724300 | 0.17288600  |
| N  | 2.22400900  | 1.87698300  | 0.46081600  |
| N  | 4.07503200  | 0.71733000  | 0.17255600  |
| C  | -3.14747800 | 1.63389300  | 0.38446400  |
| C  | -3.98963800 | 2.32222900  | -0.50427900 |
| C  | -2.36982900 | 2.35207300  | 1.30932700  |
| C  | -4.05070400 | 3.71319700  | -0.46677100 |
| H  | -4.57536200 | 1.77344300  | -1.23307300 |
| C  | -2.43862500 | 3.74412800  | 1.33617300  |
| H  | -1.73092700 | 1.81917500  | 2.00915100  |
| C  | -3.27670200 | 4.42647500  | 0.45220100  |

|    |              |             |             |
|----|--------------|-------------|-------------|
| H  | -4.69586000  | 4.24105500  | -1.16347000 |
| H  | -1.83590600  | 4.29253300  | 2.05416700  |
| H  | -3.32564400  | 5.51181500  | 0.47599800  |
| C  | 3.14758600   | -1.63384800 | 0.38426900  |
| C  | 3.98976400   | -2.32205200 | -0.50455800 |
| C  | 2.37018800   | -2.35212900 | 1.30925300  |
| C  | 4.05114000   | -3.71300300 | -0.46697300 |
| H  | 4.57525600   | -1.77317600 | -1.23347800 |
| C  | 2.43929500   | -3.74416600 | 1.33618500  |
| H  | 1.73124600   | -1.81930200 | 2.00909300  |
| C  | 3.27741600   | -4.42638500 | 0.45215200  |
| H  | 4.69630800   | -4.24077000 | -1.16373000 |
| H  | 1.83678400   | -4.29266600 | 2.05427900  |
| H  | 3.32659600   | -5.51171400 | 0.47601800  |
| N  | -5.39901800  | -0.33779100 | 0.09557400  |
| N  | 5.39884700   | 0.33795400  | 0.09533500  |
| C  | -6.20633200  | -1.15434500 | -0.48308100 |
| C  | 6.20612100   | 1.15442100  | -0.48349200 |
| H  | -5.86215000  | -2.08545400 | -0.94429900 |
| H  | 5.86189200   | 2.08538100  | -0.94497300 |
| C  | -7.63689300  | -0.86865300 | -0.57111000 |
| C  | -8.46720200  | -1.75870500 | -1.27070800 |
| C  | -8.20230800  | 0.27474400  | 0.02370200  |
| C  | -9.83508000  | -1.51965700 | -1.38537200 |
| H  | -8.04117400  | -2.64577200 | -1.73281400 |
| C  | -9.56475700  | 0.52422400  | -0.08464000 |
| H  | -7.56175800  | 0.95929300  | 0.56965200  |
| C  | -10.36280300 | -0.37870600 | -0.78897600 |
| H  | -10.47901700 | -2.20391400 | -1.92593500 |
| H  | -10.00828300 | 1.40231600  | 0.37117200  |
| C  | 7.63672200   | 0.86878900  | -0.57136500 |
| C  | 8.46701400   | 1.75857800  | -1.27129700 |
| C  | 8.20215400   | -0.27433000 | 0.02396600  |
| C  | 9.83491100   | 1.51954000  | -1.38580100 |
| H  | 8.04097400   | 2.64543700  | -1.73379300 |
| C  | 9.56462300   | -0.52378600 | -0.08420000 |
| H  | 7.56160700   | -0.95867300 | 0.57017000  |
| C  | 10.36266500  | 0.37887300  | -0.78888900 |
| H  | 10.47883600  | 2.20359800  | -1.92663000 |
| H  | 10.00817700  | -1.40165000 | 0.37202600  |
| Cl | -12.12052400 | -0.06005300 | -0.92525800 |
| Cl | 12.12039900  | 0.06024600  | -0.92495400 |
| Cl | 0.00048500   | 0.00029200  | 2.90795200  |
| Cl | -0.00025000  | -0.00088600 | -1.81767700 |

**Cartesian Coordinates** [MPW1PW91/6-31G(d)/LanL2DZ]

|    |             |             |            |
|----|-------------|-------------|------------|
| Cu | -0.00000400 | -0.00006900 | 0.59471300 |
| N  | -1.91701400 | -0.55883600 | 0.56380800 |
| C  | -3.01148500 | 0.15470900  | 0.39677700 |
| C  | -3.48217900 | -1.97878800 | 0.31649500 |
| H  | -4.04172400 | -2.89891300 | 0.27657100 |
| N  | 1.91698700  | 0.55876300  | 0.56372500 |
| C  | 3.01148200  | -0.15475100 | 0.39671900 |
| C  | 3.48209300  | 1.97875800  | 0.31627300 |
| H  | 4.04160100  | 2.89890200  | 0.27626800 |

|    |              |             |             |
|----|--------------|-------------|-------------|
| N  | -2.20467700  | -1.88344700 | 0.53308600  |
| N  | -4.04113700  | -0.72910900 | 0.21286500  |
| N  | 2.20459800   | 1.88338400  | 0.53289400  |
| N  | 4.04109500   | 0.72909400  | 0.21272100  |
| C  | -3.10599300  | 1.61014500  | 0.40542000  |
| C  | -3.94079700  | 2.29520900  | -0.48514300 |
| C  | -2.31673200  | 2.32421200  | 1.31623000  |
| C  | -3.98329600  | 3.68323600  | -0.46227000 |
| H  | -4.53470400  | 1.74597300  | -1.20562000 |
| C  | -2.36559700  | 3.71319600  | 1.32719500  |
| H  | -1.68435400  | 1.78923100  | 2.02089600  |
| C  | -3.19702100  | 4.39398300  | 0.44208700  |
| H  | -4.62342900  | 4.21168300  | -1.16098600 |
| H  | -1.75214900  | 4.26073600  | 2.03456900  |
| H  | -3.23113700  | 5.47871800  | 0.45341700  |
| C  | 3.10605600   | -1.61018300 | 0.40546400  |
| C  | 3.94088200   | -2.29526700 | -0.48506300 |
| C  | 2.31685600   | -2.32422700 | 1.31634500  |
| C  | 3.98346400   | -3.68329000 | -0.46208500 |
| H  | 4.53474700   | -1.74605300 | -1.20559100 |
| C  | 2.36580200   | -3.71320800 | 1.32741500  |
| H  | 1.68446600   | -1.78923000 | 2.02098800  |
| C  | 3.19724900   | -4.39401400 | 0.44234200  |
| H  | 4.62361500   | -4.21175300 | -1.16077200 |
| H  | 1.75240300   | -4.26072900 | 2.03484500  |
| H  | 3.23143100   | -5.47874600 | 0.45375700  |
| N  | -5.35125500  | -0.34921600 | 0.11058400  |
| N  | 5.35122500   | 0.34924200  | 0.11043400  |
| C  | -6.14447000  | -1.15992200 | -0.48509800 |
| C  | 6.14439700   | 1.15993500  | -0.48532200 |
| H  | -5.79199000  | -2.08845100 | -0.94283300 |
| H  | 5.79187400   | 2.08842300  | -0.94310900 |
| C  | -7.56729800  | -0.86770700 | -0.59994300 |
| C  | -8.38484000  | -1.74317800 | -1.32313600 |
| C  | -8.13420600  | 0.27007100  | -0.00701000 |
| C  | -9.74428300  | -1.49436000 | -1.46338500 |
| H  | -7.95557300  | -2.62740500 | -1.78496400 |
| C  | -9.48835100  | 0.52899000  | -0.14052700 |
| H  | -7.50006300  | 0.94335000  | 0.55848400  |
| C  | -10.27554000 | -0.35881600 | -0.86838800 |
| H  | -10.38176600 | -2.16719100 | -2.02349700 |
| H  | -9.93623100  | 1.40413300  | 0.31420300  |
| C  | 7.56723200   | 0.86776100  | -0.60018200 |
| C  | 8.38472900   | 1.74321500  | -1.32344500 |
| C  | 8.13419100   | -0.26996200 | -0.00719200 |
| C  | 9.74417800   | 1.49443400  | -1.46370800 |
| H  | 7.95542300   | 2.62740100  | -1.78531700 |
| C  | 9.48834100   | -0.52884600 | -0.14072500 |
| H  | 7.50008200   | -0.94322800 | 0.55835500  |
| C  | 10.27548500  | 0.35894200  | -0.86865600 |
| H  | 10.38162600  | 2.16725200  | -2.02387400 |
| H  | 9.93625900   | -1.40394800 | 0.31404700  |
| Cl | -12.01071000 | -0.02986500 | -1.03643100 |
| Cl | 12.01066100  | 0.03003600  | -1.03671900 |
| Cl | 0.00001400   | 0.00003500  | 2.94469100  |

|    |             |             |             |
|----|-------------|-------------|-------------|
| Cl | -0.00003300 | -0.00014500 | -1.73226100 |
|----|-------------|-------------|-------------|

**Cartesian Coordinates [B3PW91/6-31G(d)/LanL2DZ]**

|    |              |             |             |
|----|--------------|-------------|-------------|
| Cu | -0.00000900  | -0.00013800 | 0.55493300  |
| N  | -1.92297400  | -0.54885200 | 0.52538800  |
| C  | -3.02127000  | 0.16733200  | 0.36960200  |
| C  | -3.49372500  | -1.97094400 | 0.28473500  |
| H  | -4.05440800  | -2.89223500 | 0.24664200  |
| N  | 1.92292200   | 0.54869500  | 0.52530700  |
| C  | 3.02126100   | -0.16743000 | 0.36955500  |
| C  | 3.49357500   | 1.97087100  | 0.28450400  |
| H  | 4.05419700   | 2.89219600  | 0.24632100  |
| N  | -2.21192600  | -1.87662200 | 0.49220700  |
| N  | -4.05497300  | -0.71866600 | 0.19008500  |
| N  | 2.21178600   | 1.87648100  | 0.49200700  |
| N  | 4.05490100   | 0.71862300  | 0.18994500  |
| C  | -3.11913300  | 1.62408200  | 0.38496600  |
| C  | -3.96014600  | 2.31201200  | -0.50128400 |
| C  | -2.32984600  | 2.33880000  | 1.29879300  |
| C  | -4.00948600  | 3.70166100  | -0.47065800 |
| H  | -4.55340300  | 1.76364000  | -1.22520400 |
| C  | -2.38605600  | 3.72935000  | 1.31791600  |
| H  | -1.69146600  | 1.80230200  | 1.99886700  |
| C  | -3.22405400  | 4.41238300  | 0.43749300  |
| H  | -4.65470000  | 4.23138200  | -1.16640300 |
| H  | -1.77283100  | 4.27668400  | 2.02824900  |
| H  | -3.26365000  | 5.49856200  | 0.45526100  |
| C  | 3.11923400   | -1.62417100 | 0.38503100  |
| C  | 3.96029100   | -2.31210000 | -0.50117800 |
| C  | 2.33002800   | -2.33888600 | 1.29893200  |
| C  | 4.00975900   | -3.70174200 | -0.47043700 |
| H  | 4.55349000   | -1.76373600 | -1.22515100 |
| C  | 2.38636400   | -3.72942900 | 1.31816800  |
| H  | 1.69161800   | -1.80238900 | 1.99897800  |
| C  | 3.22440800   | -4.41246000 | 0.43778700  |
| H  | 4.65500900   | -4.23146300 | -1.16615000 |
| H  | 1.77320300   | -4.27675900 | 2.02855900  |
| H  | 3.26410400   | -5.49863400 | 0.45564500  |
| N  | -5.36943600  | -0.33898800 | 0.10477800  |
| N  | 5.36938700   | 0.33902300  | 0.10463500  |
| C  | -6.17009600  | -1.15015000 | -0.48720500 |
| C  | 6.16998000   | 1.15019000  | -0.48743300 |
| H  | -5.81998300  | -2.07576200 | -0.95656900 |
| H  | 5.81979500   | 2.07574300  | -0.95685900 |
| C  | -7.59677900  | -0.86383600 | -0.58141300 |
| C  | -8.42054400  | -1.73966300 | -1.30212900 |
| C  | -8.16476400  | 0.26712200  | 0.02898800  |
| C  | -9.78505500  | -1.49785100 | -1.42299400 |
| H  | -7.99175700  | -2.61898800 | -1.77740100 |
| C  | -9.52398700  | 0.51930700  | -0.08515100 |
| H  | -7.52733600  | 0.94081500  | 0.59312600  |
| C  | -10.31636800 | -0.36870300 | -0.81109400 |
| H  | -10.42603000 | -2.17166200 | -1.98099400 |
| H  | -9.97121600  | 1.38937900  | 0.38352700  |
| C  | 7.59667900   | 0.86395900  | -0.58165400 |

|    |              |             |             |
|----|--------------|-------------|-------------|
| C  | 8.42037200   | 1.73978400  | -1.30245400 |
| C  | 8.16474900   | -0.26691900 | 0.02881600  |
| C  | 9.78489600   | 1.49804800  | -1.42333200 |
| H  | 7.99152000   | 2.61904700  | -1.77778200 |
| C  | 9.52398400   | -0.51902900 | -0.08533600 |
| H  | 7.52737500   | -0.94061100 | 0.59301700  |
| C  | 10.31629300  | 0.36897700  | -0.81136200 |
| H  | 10.42581500  | 2.17185900  | -1.98139500 |
| H  | 9.97127800   | -1.38903800 | 0.38339500  |
| Cl | -12.06083200 | -0.04838200 | -0.95439900 |
| Cl | 12.06077400  | 0.04875400  | -0.95468600 |
| Cl | 0.00000300   | -0.00001400 | 2.91513400  |
| Cl | -0.00003700  | -0.00021800 | -1.78147500 |

**Cartesian Coordinates** [PBEPBE/6-31G(d)/LanL2DZ]

|    |             |             |             |
|----|-------------|-------------|-------------|
| Cu | -0.00002400 | -0.00035700 | 0.60170200  |
| N  | -1.91290100 | -0.56358000 | 0.56873700  |
| C  | -3.01608700 | 0.16735500  | 0.39751400  |
| C  | -3.50102400 | -1.98750700 | 0.30149800  |
| H  | -4.07217100 | -2.91124300 | 0.25715400  |
| N  | 1.91276900  | 0.56314900  | 0.56864600  |
| C  | 3.01606800  | -0.16763300 | 0.39749100  |
| C  | 3.50066300  | 1.98729700  | 0.30120600  |
| H  | 4.07166300  | 2.91111800  | 0.25673700  |
| N  | -2.20929400 | -1.90134700 | 0.53241700  |
| N  | -4.05999300 | -0.72333800 | 0.20024100  |
| N  | 2.20895100  | 1.90095900  | 0.53215700  |
| N  | 4.05982800  | 0.72320300  | 0.20009100  |
| C  | -3.10354700 | 1.62618500  | 0.40893200  |
| C  | -3.97808000 | 2.32423200  | -0.45212100 |
| C  | -2.26630300 | 2.34407600  | 1.29305800  |
| C  | -4.01129000 | 3.72255700  | -0.42682200 |
| H  | -4.60977500 | 1.77393100  | -1.15349300 |
| C  | -2.30747000 | 3.74266800  | 1.30479800  |
| H  | -1.60740000 | 1.80084500  | 1.98257400  |
| C  | -3.17722300 | 4.43471200  | 0.44885400  |
| H  | -4.68340500 | 4.25872700  | -1.10440300 |
| H  | -1.65677500 | 4.29074100  | 1.99317800  |
| H  | -3.20428500 | 5.52926500  | 0.46100600  |
| C  | 3.10377600  | -1.62644800 | 0.40905900  |
| C  | 3.97841200  | -2.32442600 | -0.45194600 |
| C  | 2.26668900  | -2.34440100 | 1.29328300  |
| C  | 4.01187500  | -3.72274300 | -0.42650700 |
| H  | 4.60999200  | -1.77408200 | -1.15338800 |
| C  | 2.30811000  | -3.74298500 | 1.30516300  |
| H  | 1.60771300  | -1.80122200 | 1.98277000  |
| C  | 3.17796200  | -4.43495900 | 0.44926400  |
| H  | 4.68407100  | -4.25886000 | -1.10405100 |
| H  | 1.65753600  | -4.29110400 | 1.99362100  |
| H  | 3.20522300  | -5.52950600 | 0.46152700  |
| N  | -5.37772400 | -0.33225500 | 0.09736300  |
| N  | 5.37761800  | 0.33231600  | 0.09722800  |
| C  | -6.18258300 | -1.15698500 | -0.50200400 |
| C  | 6.18232900  | 1.15709800  | -0.50226500 |
| H  | -5.82803600 | -2.09466200 | -0.96517400 |

|    |              |             |             |
|----|--------------|-------------|-------------|
| H  | 5.82762000   | 2.09465800  | -0.96554600 |
| C  | -7.60833200  | -0.86552200 | -0.61072500 |
| C  | -8.43824100  | -1.75618100 | -1.32573400 |
| C  | -8.18022500  | 0.28697500  | -0.02184600 |
| C  | -9.80814800  | -1.50964400 | -1.46050600 |
| H  | -8.00552800  | -2.65204300 | -1.78465800 |
| C  | -9.54477700  | 0.54477700  | -0.15021300 |
| H  | -7.53696500  | 0.97254000  | 0.53710000  |
| C  | -10.34116000 | -0.35946200 | -0.86895700 |
| H  | -10.45398900 | -2.19520200 | -2.01387600 |
| H  | -9.99520100  | 1.43164400  | 0.30194200  |
| C  | 7.60812400   | 0.86585500  | -0.61097900 |
| C  | 8.43787000   | 1.75655700  | -1.32612200 |
| C  | 8.18022100   | -0.28647000 | -0.02195900 |
| C  | 9.80781600   | 1.51023000  | -1.46088800 |
| H  | 8.00500000   | 2.65228700  | -1.78515400 |
| C  | 9.54481300   | -0.54406100 | -0.15031900 |
| H  | 7.53708600   | -0.97206800 | 0.53709000  |
| C  | 10.34103100  | 0.36021500  | -0.86919800 |
| H  | 10.45353200  | 2.19582200  | -2.01436200 |
| H  | 9.99539300   | -1.43079300 | 0.30194400  |
| Cl | -12.09438500 | -0.03282300 | -1.02928000 |
| Cl | 12.09430700  | 0.03384800  | -1.02951200 |
| Cl | -0.00004700  | -0.00011200 | 2.99146400  |
| Cl | -0.00005000  | -0.00046200 | -1.76067800 |

**Table S3. Calculations of selected bond lengths for the copper(II) complex (6) using higher basis set.**

| No. | Atoms *  | Experimental | CAM-B3LYP         |                    |                     |
|-----|----------|--------------|-------------------|--------------------|---------------------|
|     |          |              | 6-31+G(d)/LanL2DZ | 6-31G(d,p)/LanL2DZ | 6-31+G(d,p)/LanL2DZ |
| 1   | Cu1-Cl65 | 2.2552       | 2.32508           | 2.32232            | 2.32463             |
| 2   | Cu1-N6   | 1.9603       | 2.00044           | 1.98960            | 2.00010             |
| 3   | N6-N12   | 1.3780       | 1.36026           | 1.36036            | 1.35986             |
| 4   | N6-C7    | 1.3010       | 1.31448           | 1.31399            | 1.31458             |
| 5   | N12-C8   | 1.2890       | 1.29748           | 1.29672            | 1.29772             |
| 6   | N13-C8   | 1.3610       | 1.37347           | 1.37381            | 1.37371             |
| 7   | N13-C7   | 1.3600       | 1.36713           | 1.36750            | 1.36694             |
| 8   | C7-C25   | 1.4540       | 1.46466           | 1.46375            | 1.46456             |
| 9   | N13-N37  | 1.3840       | 1.37837           | 1.37585            | 1.37824             |
| 10  | N37-C39  | 1.2670       | 1.27684           | 1.27633            | 1.27688             |
| 11  | C39-C52  | 1.4490       | 1.46358           | 1.46269            | 1.46359             |
| 12  | Cl63-C59 | 1.7300       | 1.77680           | 1.77702            | 1.77670             |

\* The numbers described here for the atoms are according to the numbers mentioned for the optimized geometry of the complex in Figure 3a, generated during the visualization using GaussView software.

**Table S4. Reaction Energies and Bond Dissociation Energies for Tautomers (3) and (3A)**

**Computed Energies [values are in Hartree], Optimized structures and Cartesian Coordinates (B3LYP/6-31+G(d,p))**

| Species                                                                                   | Total Electronic Energy                                                                                                                                                                                                                                                                                                                                | Sum of Electronic and Zero-point Energies                                                                                                                                                                                                                                                                    | Sum of Electronic and Thermal Enthalpies                                                                                                                                                                                                                                                                      | Gibbs Free Energy |
|-------------------------------------------------------------------------------------------|--------------------------------------------------------------------------------------------------------------------------------------------------------------------------------------------------------------------------------------------------------------------------------------------------------------------------------------------------------|--------------------------------------------------------------------------------------------------------------------------------------------------------------------------------------------------------------------------------------------------------------------------------------------------------------|---------------------------------------------------------------------------------------------------------------------------------------------------------------------------------------------------------------------------------------------------------------------------------------------------------------|-------------------|
| 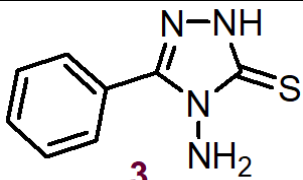<br>3    | -926.8696219                                                                                                                                                                                                                                                                                                                                           | -926.709329                                                                                                                                                                                                                                                                                                  | -926.697429                                                                                                                                                                                                                                                                                                   | -926.747848       |
|        | N -0.53911900<br>C -0.07971800<br>N -1.15000600<br>C -2.34348800<br>N -1.90019300<br>C 1.36084000<br>C 2.25406500<br>C 3.62855000<br>C 4.13866100<br>C 3.25906000<br>C 1.87747700<br>S -3.89733400<br>N -1.08653100<br>H 1.85753500<br>H 4.30370900<br>H 5.21162400<br>H 3.64470200<br>H 1.20065600<br>H -1.67970700<br>H -1.53488700<br>H -2.48802100 | -1.67307200<br>-0.44554900<br>0.44291800<br>-0.27002000<br>-1.54764800<br>-0.14034300<br>-1.22256400<br>-1.00510500<br>0.29258900<br>1.36836700<br>1.16102900<br>0.34054700<br>1.83646100<br>-2.22729300<br>-1.84957400<br>0.46060400<br>2.37925500<br>1.99951700<br>2.21282900<br>2.10009200<br>-2.36522800 | -0.10800200<br>-0.03222700<br>0.02629100<br>-0.01385500<br>-0.09486000<br>-0.00988100<br>0.11902900<br>0.12674900<br>0.00657500<br>-0.12052400<br>-0.12841000<br>0.02639900<br>0.12506300<br>0.21254400<br>0.22868700<br>0.01363600<br>-0.21456100<br>-0.22047200<br>-0.61603800<br>1.00366600<br>-0.15402800 |                   |
| <br>TS | -926.7920054                                                                                                                                                                                                                                                                                                                                           | -926.638715                                                                                                                                                                                                                                                                                                  | -926.627809                                                                                                                                                                                                                                                                                                   | -926.674843       |
|        | N -0.61605000<br>N -1.97269400<br>C -2.26739600<br>N -1.10199500<br>S -3.97964200<br>H -3.34694000<br>C -0.07696900                                                                                                                                                                                                                                    | -1.56951400<br>-1.38077400<br>-0.09126000<br>0.60480100<br>0.11059400<br>-1.49841400<br>-0.36459200                                                                                                                                                                                                          | -0.00005300<br>-0.00006500<br>-0.00002400<br>-0.00001400<br>0.00003400<br>-0.00000300<br>-0.00002900                                                                                                                                                                                                          |                   |

|                                                                                     |              |             |             |             |  |
|-------------------------------------------------------------------------------------|--------------|-------------|-------------|-------------|--|
|                                                                                     | N            | -0.96677200 | 2.00024900  | 0.00005700  |  |
|                                                                                     | H            | -1.43102100 | 2.37007300  | -0.82725100 |  |
|                                                                                     | H            | -1.43093600 | 2.36998300  | 0.82745400  |  |
|                                                                                     | C            | 1.37746200  | -0.13672500 | -0.00001500 |  |
|                                                                                     | C            | 1.97096300  | 1.13782500  | -0.00006600 |  |
|                                                                                     | C            | 2.20951200  | -1.27509600 | 0.00005000  |  |
|                                                                                     | C            | 3.36244500  | 1.26405600  | -0.00004700 |  |
|                                                                                     | H            | 1.34761400  | 2.02144600  | -0.00012200 |  |
|                                                                                     | C            | 3.59416400  | -1.13809200 | 0.00006900  |  |
|                                                                                     | H            | 1.75444300  | -2.25895600 | 0.00008500  |  |
|                                                                                     | C            | 4.17966900  | 0.13314100  | 0.00002100  |  |
|                                                                                     | H            | 3.80498600  | 2.25599200  | -0.00008800 |  |
|                                                                                     | H            | 4.21895400  | -2.02644500 | 0.00012100  |  |
|                                                                                     | H            | 5.26065100  | 0.23792800  | 0.00003700  |  |
| 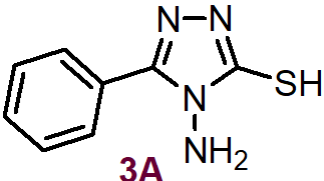   | -926.8412128 | -926.685153 | -926.672885 | -926.723954 |  |
|  | N            | 0.54236300  | -1.67686700 | -0.00051400 |  |
|                                                                                     | C            | 0.05993700  | -0.44936400 | -0.00006700 |  |
|                                                                                     | N            | 1.12965100  | 0.43930000  | 0.00004000  |  |
|                                                                                     | C            | 2.25186100  | -0.35666500 | -0.00024300 |  |
|                                                                                     | N            | 1.92211000  | -1.62303900 | -0.00065100 |  |
|                                                                                     | C            | -1.37946400 | -0.14215100 | -0.00012300 |  |
|                                                                                     | C            | -2.27090900 | -1.23407900 | 0.00066200  |  |
|                                                                                     | C            | -3.64670800 | -1.02317700 | 0.00080500  |  |
|                                                                                     | C            | -4.16375900 | 0.27735100  | -0.00001600 |  |
|                                                                                     | C            | -3.28728200 | 1.36329600  | -0.00080200 |  |
|                                                                                     | C            | -1.90459000 | 1.16191000  | -0.00093900 |  |
|                                                                                     | S            | 3.87567100  | 0.33421200  | -0.00008100 |  |
|                                                                                     | N            | 1.09073100  | 1.83907100  | 0.00136300  |  |
|                                                                                     | H            | -1.86520800 | -2.23939200 | 0.00132700  |  |
|                                                                                     | H            | -4.31841900 | -1.87673900 | 0.00163400  |  |
|                                                                                     | H            | -5.23771600 | 0.43955600  | 0.00013200  |  |
|                                                                                     | H            | -3.67634200 | 2.37753500  | -0.00149600 |  |
|                                                                                     | H            | -1.23485100 | 2.01122600  | -0.00155600 |  |
|                                                                                     | H            | 4.46084400  | -0.87908500 | 0.00101400  |  |
|                                                                                     | H            | 1.55668400  | 2.19298100  | 0.83404100  |  |
|                                                                                     | H            | 1.55578300  | 2.19455400  | -0.83114100 |  |
|  | -926.3263849 | -926.180145 | -926.168341 | -926.218261 |  |
|  | N            | -0.57355200 | -1.70096500 | -0.02446400 |  |
|                                                                                     | C            | -0.09893800 | -0.46459400 | -0.00563300 |  |
|                                                                                     | N            | -1.17545100 | 0.40220700  | 0.01139500  |  |
|                                                                                     | C            | -2.33152400 | -0.37839800 | -0.00318400 |  |
|                                                                                     | N            | -1.94333400 | -1.66342500 | -0.02647600 |  |
|                                                                                     | C            | 1.32984900  | -0.14895100 | -0.00310000 |  |
|                                                                                     | C            | 2.25068900  | -1.22155600 | 0.03440200  |  |
|                                                                                     | C            | 3.62239400  | -0.98867300 | 0.03425200  |  |
|                                                                                     | C            | 4.12585000  | 0.31969000  | -0.00289100 |  |
|                                                                                     | C            | 3.22516800  | 1.38683200  | -0.04116300 |  |
|                                                                                     | C            | 1.84540400  | 1.16340700  | -0.04132900 |  |

|                                                                                    |   |              |             |             |
|------------------------------------------------------------------------------------|---|--------------|-------------|-------------|
|                                                                                    | S | -3.90555900  | 0.31676000  | -0.00439200 |
|                                                                                    | N | -1.16178200  | 1.80786500  | 0.04038800  |
|                                                                                    | H | 1.85657500   | -2.23164200 | 0.06250900  |
|                                                                                    | H | 4.30693800   | -1.83359100 | 0.06407800  |
|                                                                                    | H | 5.19805700   | 0.49948900  | -0.00219700 |
|                                                                                    | H | 3.59566900   | 2.40929600  | -0.07209300 |
|                                                                                    | H | 1.15353900   | 1.99585600  | -0.07364500 |
|                                                                                    | H | -1.84904500  | 2.09072000  | -0.66401100 |
|                                                                                    | H | -1.60729700  | 2.07540400  | 0.92160700  |
| 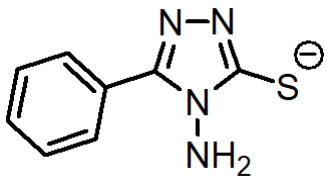  |   | -926.3263844 | -926.180134 | -926.168338 |
|                                                                                    |   |              |             | -926.218210 |
|  | N | -0.57326800  | -1.70113300 | -0.02464100 |
|                                                                                    | C | -0.09886500  | -0.46475900 | -0.00604900 |
|                                                                                    | N | -1.17535100  | 0.40201000  | 0.01078900  |
|                                                                                    | C | -2.33126200  | -0.37871800 | -0.00377600 |
|                                                                                    | N | -1.94340700  | -1.66340400 | -0.02686200 |
|                                                                                    | C | 1.32994300   | -0.14894300 | -0.00323800 |
|                                                                                    | C | 2.25064200   | -1.22150800 | 0.03449400  |
|                                                                                    | C | 3.62236100   | -0.98854800 | 0.03485700  |
|                                                                                    | C | 4.12565800   | 0.31986000  | -0.00228800 |
|                                                                                    | C | 3.22499000   | 1.38703400  | -0.04142100 |
|                                                                                    | C | 1.84517800   | 1.16348100  | -0.04203500 |
|                                                                                    | S | -3.90550300  | 0.31704300  | -0.00389400 |
|                                                                                    | N | -1.16187700  | 1.80753000  | 0.04071200  |
|                                                                                    | H | 1.85639000   | -2.23152600 | 0.06324700  |
|                                                                                    | H | 4.30713500   | -1.83325500 | 0.06521500  |
|                                                                                    | H | 5.19789600   | 0.49954700  | -0.00132400 |
|                                                                                    | H | 3.59541300   | 2.40947400  | -0.07376700 |
|                                                                                    | H | 1.15327000   | 1.99582400  | -0.07585600 |
|                                                                                    | H | -1.85140500  | 2.09018600  | -0.66170400 |
|                                                                                    | H | -1.60522000  | 2.07464000  | 0.92325500  |

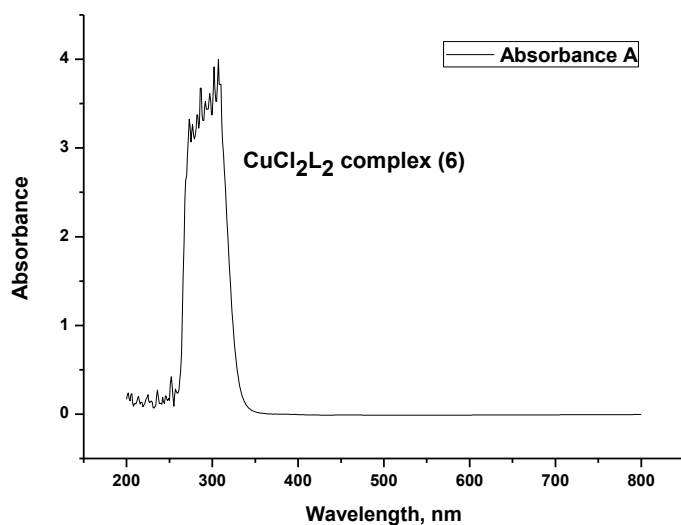

Figure S1. UV-visible spectrum of the copper(II) complex (6).

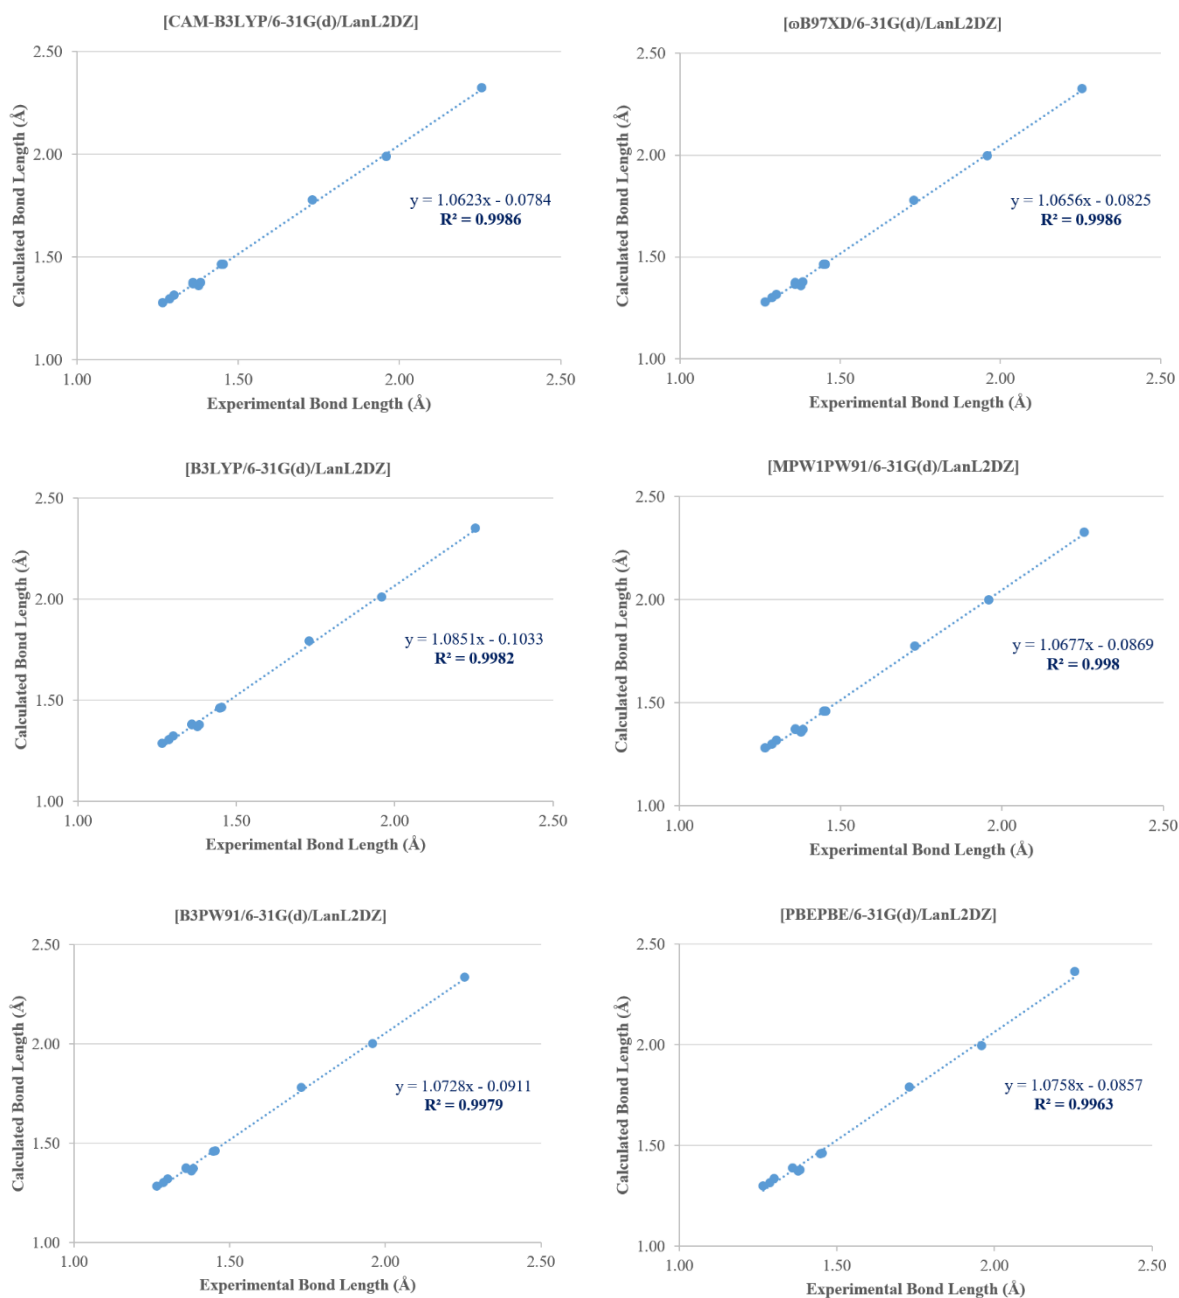

**Figure S2.** The correlation between experimental and computed values for the selected bond lengths present in the copper(II) complex (6) using pure and hybrid functionals with 6-31G(d)/LanL2DZ mixed basis set.

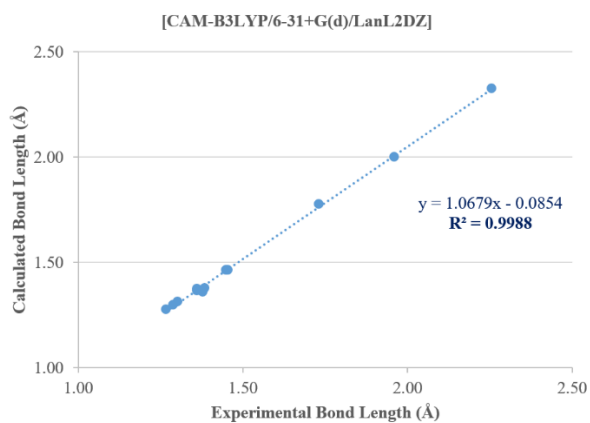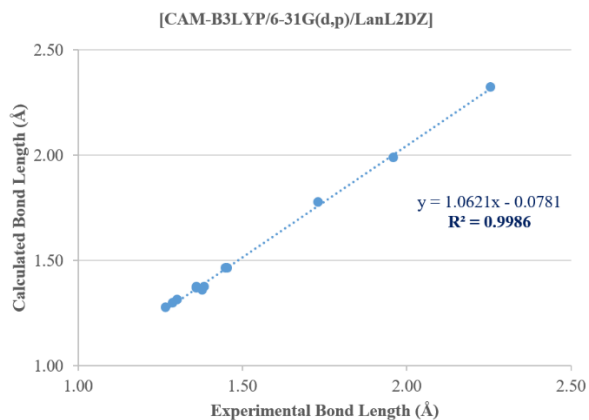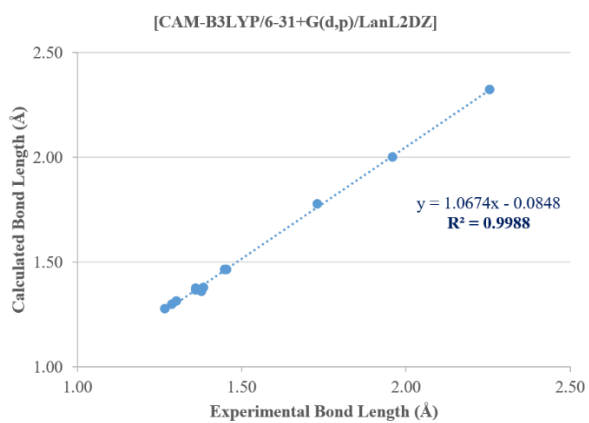

**Figure S3. A comparative correlation to evaluate the performance of various basis sets using CAM-B3LYP method for experimental and calculated bond lengths, for the selected bond lengths present in the copper(II) complex (6).**
